# Supplementary material for: What role do socioeconomic and clinical factors play in disease activity states in rheumatoid arthritis? Data from a large UK early inflammatory arthritis audit
Source: HighWire-hosted journal article supplement (doi:10.1136/rmdopen-2024-004180), 2024-07-01
Supplement: rmdopen-2024-004180supp001_data_supplement.pdf [file rmdopen-2024-004180supp001_data_supplement.pdf]

Supplementary Material

Supplementary Table 1. csDAMRD strategies by 3 months and RF/CCP seropositivity positive for pactiveRA and plowRA

|             | RF and/or CCP positive |                  |                      |
|-------------|------------------------|------------------|----------------------|
|             | Total<br>N = 1,186     | plowRA<br>N= 719 | pactive RA<br>N= 467 |
| No DMARD: n | 26                     | 16               | 10                   |
| MTX: n      |                        |                  |                      |
| MTX mono    | 653                    | 394              | 259                  |
| MTX combo   | 268                    | 186              | 82                   |
| HCQ: n      |                        |                  |                      |
| HCQ mono    | 140                    | 79               | 61                   |
| HCQ combo   | 268                    | 186              | 82                   |
| SSZ: n      |                        |                  |                      |
| SSZ mono    | 79                     | 36               | 43                   |
| SSZ combo   | 34                     | 17               | 17                   |

Seropositive status had 3.2% missing data n=55 missing variables of the total included patients in this study N=1,708 (plowRA =1,026 and pactiveRA = 682).  
DMARD: disease-modifying anti-rheumatic drug; RA: rheumatoid arthritis; CCP: anti-cyclic citrullinated peptide antibody; RF: rheumatoid factor; HCQ: Hydroxychloroquine; MTX: methotrexate; SSZ: sulfasalazine; n: population size; Pactive RA defined as DAS28 > 3.2 at three times point (baseline, 3 and 12 months follow up); Plow RA defined as DAS28 >3.2 at baseline and ≤ 3.2 at 3 and 12 months follow up.

Supplementary table 2. Univariable analysis: pactiveRA association with socioeconomic clinical and treatment variables compared to plowRA.

| Independent predictors at baseline         | Univariable analysis<br>OR (95% CI) |
|--------------------------------------------|-------------------------------------|
| Age (years)                                | 0.98 (0.97,0.99)                    |
| Female gender                              | 1.54 (1.24,1.90)                    |
| Ever smoked (referent never-smoked)        | 1.26 (1.01,1.57)                    |
| Black                                      | 1.55 (0.94,2.56)                    |
| Asian                                      | 1.27 (0.86,1.86)                    |
| Other                                      | 1.47 (0.80,2.69)                    |
| Ethnic minority as a group including Mixed | 1.34 (0.99,1.82)                    |
| IMD (less social deprivation)              | 0.89 (0.86,0.93)                    |
| Symptoms duration                          | 1.18 (1.08,1.29)                    |
| RDCI                                       | 1.14 (1.02,1.27)                    |
| Depression                                 | 2.36 (1.64,3.40)                    |
| Diabetes mellitus                          | 1.04 (0.74,1.47)                    |

|                                                |                  |
|------------------------------------------------|------------------|
| Hypertension                                   | 0.81 (0.62,1.05) |
| Lung disease                                   | 1.36 (1.00,1.83) |
| Gastrointestinal ulcer                         | 1.94 (1.19,3.15) |
| Seropositivity                                 | 0.91 (0.76,1.10) |
| MSKHQ (higher scores indicate better function) | 0.94 (0.92,0.95) |
| HAQ                                            | 2.51 (1.96,3.21) |
| Any MTX strategy*                              | 0.68 (0.52,0.89) |
| Any SSZ strategy*                              | 1.6 (1.19,2.18)  |
| HCQ strategy*                                  | 0.74 (0.58,0.95) |
| Corticosteroids                                | 1.14 (0.83,1.55) |

\*Any csDMARD strategy (monotherapy or combination therapy within 3 months of diagnosis).  
OR: Odds ratio; CI: confidence interval; HCQ: Hydroxychloroquine; MTX: methotrexate; SSZ: sulfasalazine; IMD: Index of multiple deprivation; RDCI: rheumatic disease comorbidity index.  
HAQ: Health Assessment Questionnaire; MSKHQ: This 15-item questionnaire evaluates how musculoskeletal symptoms affect day to day life across a range of domains including pain, fatigue, emotional well-being and work and social activities. Scores range from 0-56, with higher scores indicating better musculoskeletal function.
